# Supplementary material for: Pediatric Nephrology and Rheumatology Practice Patterns in Granulomatosis with Polyangiitis: A Midwest Pediatric Nephrology Consortium Study
Source: Hindawi journal article supplement (doi:10.1155/2018/8413096), 2018-08-05
Supplement: f1 [file 8413096.f1.pdf]

# Granulomatosis with Polyangiitis (GPA) Practice Patterns amongst Pediatric Nephrologists and Rheumatologists

VCU IRB Study ID: HM20007791. Virginia Commonwealth University, Children's Hospital of Richmond, Pediatric Nephrology

Study Objective: To study the variability in practice patterns amongst pediatric rheumatologists and nephrologists in treating pediatric granulomatosis with polyangiitis (GPA, aka Wegener's Granulomatosis).

Principal Investigator: Dr. Cristin Kaspar, [cristin.kaspar@vcuhealth.org](mailto:cristin.kaspar@vcuhealth.org), Ph 804-628-3866, CHoR at VCU Pediatric Nephrology

Co-P.I.: Dr. Keia Sanderson, UNC Pediatric Nephrology

Dr. Timothy E. Bunchman, [timothy.bunchman@vcuhealth.org](mailto:timothy.bunchman@vcuhealth.org), CHoR at VCU Pediatric Nephrology

Dr. Megan Lo, [megan.lo@vcuhealth.org](mailto:megan.lo@vcuhealth.org), CHoR at VCU Pediatric Nephrology

Dr. Sarah Hoffman, [sarah.hoffman@vcuhealth.org](mailto:sarah.hoffman@vcuhealth.org), CHoR at VCU Pediatric Rheumatology

This is a voluntary survey that will query your first-line choices in: induction, maintenance, relapse definitions, duration of therapy, and other practice patterns in this disease.

Total participation time estimated to be 10 minutes.

By clicking on this link, you agree to participate in the study. No patient-specific or participant-specific data will be requested or collected, and all responses will remain anonymous.

Your participation in this survey is greatly appreciated! Please email [cristin.kaspar@vcuhealth.org](mailto:cristin.kaspar@vcuhealth.org) for any questions regarding the survey.

---



---

**SECTION 1 of 5: GENERAL CHARACTERISTICS**

**The following section pertains to general characteristics of your institution / practice.**

**\*Granulomatosis Polyangiitis will hereafter be abbreviated "GPA"**

What is the name of your institution / practice group? \_\_\_\_\_

Note: this information will only be used to track percent response. Name of institution will NOT be included in any publication materials and will only be viewed by the PI of the study.

Are you a pediatric:

- rheumatologist  
 nephrologist

Does your institution have a pediatric rheumatology division?

- Yes  
 No

How many providers are currently employed in the pediatric rheumatology division? \_\_\_\_\_

\*\* If there is no rheumatology division, enter "0"

Does your institution have a pediatric nephrology division?

- Yes  
 No

How many providers are currently employed in the pediatric nephrology division? \_\_\_\_\_

\*\* If there is no nephrology division, enter "0"

Are you a:

- MD/DO practicing >5 years  
 MD/DO practicing < 5 years  
 MD/DO fellow in training  
 Mid-level provider NP/PA

What type of institution do you practice in?

- University / Tertiary Care Center (teaching, academic)  
 Community Hospital (non-teaching, non-academic)  
 Private practice (majority outpatient)

Do you supervise fellows directly in your division?

- Yes  
 No

Who manages pediatric GPA patients primarily at your institution?

- Pediatric Nephrology  
 Pediatric Rheumatology  
 co-managed, or combined Pediatric Nephrology/Rheumatology clinic  
 Adult Nephrology  
 Adult Rheumatology  
 co-managed or combined Adult Nephrology/Rheumatology clinic  
 Other  
 (Choose 'Other' if you would like to expand on your answer)

Expand on your answer 'Other':

How many pediatric GPA patients are currently followed by your practice?

- 
- 0
  - 1
  - 2-4
  - 5-7
  - 8-10
  - 11+

Does your division have a WRITTEN consensus protocol for INDUCTION medications for treatment of GPA?

- Yes
- No

Does your division have a WRITTEN consensus protocol for MAINTENANCE medications for treatment of GPA?

- Yes
- No

---



---

## SECTION 2 of 5: INDUCTION MEDICATIONS

The following questions address your **INDIVIDUAL** first-line preference in Induction medications for a **NEW DIAGNOSIS GPA WITH GLOMERULONEPHRITIS**.

**\*\* There are 2 separate questions specifically about Induction with a presentation of: Rapidly Progressive Glomerulonephritis (RPGN) and one of Pulmonary Hemorrhage. After these questions please return to framing your responses for a presentation of new diagnosis GPA with glomerulonephritis.**

NEW DIAGNOSIS GPA WITH GLOMERULONEPHRITIS

What medication(s) do you prefer to use as first-line for INDUCTION?

You may select multiple answers

Expand on your answer 'Other':

- IV or PO cyclophosphamide
- rituximab
- IV or PO steroid
- plasmapheresis
- other

If a new diagnosis GPA with RAPIDLY PROGRESSIVE GLOMERULONEPHRITIS (RPGN) requires INDUCTION, would your treatment be any different?

- Yes
- No

GPA WITH RPGN

What medication(s) do you prefer to use as first-line for INDUCTION?

You may select multiple answers

Explain your answer 'Other'

- IV or PO cyclophosphamide
- rituximab
- IV or PO steroid
- plasmapheresis
- other

Please explain the difference - specifically, dosing and duration of the 'additional' induction medications, and rationale of your choice.

If a new diagnosis GPA with PULMONARY HEMORRHAGE requires INDUCTION, would your treatment be any different?

- Yes
- No

GPA WITH PULMONARY HEMORRHAGE

What medication(s) do you prefer to use as first-line for INDUCTION?

You may select multiple answers

Explain your answer 'Other'

- IV or PO cyclophosphamide
- rituximab
- IV or PO steroid
- plasmapheresis
- other

Please explain the difference - specifically, dosing and duration of the 'additional' induction medications, and rationale of your choice.

NEW DIAGNOSIS GPA WITH NEPHRITIS

What form of Cyclophosphamide do you prefer to use for INDUCTION?

- IV  
 PO

What is the typical duration of INDUCTION Cyclophosphamide?

- < 1 month  
 1 month  
 >1 to 2 months  
 >2 to 3 months  
 > 3 to 6 months  
 > 6 to 12 months  
 > 12 to 18 months  
 > 18 to 24 months

At what interval do you prescribe the INDUCTION Cyclophosphamide?

- Daily (oral)  
 Once per month (IV)  
 Every 2 weeks (IV)  
 Other

Expand on your answer 'Other'

Do you use an increasing-dose protocol for Cyclophosphamide?

- Yes  
 No

[e.g. start at 500mg/m<sup>2</sup>, then 750 mg/m<sup>2</sup>, stop at 1000 mg/m<sup>2</sup>]

What unit of measure do you base Cyclophosphamide dosing on?

- mg/m<sup>2</sup>  
 mg/kg

What DOSE do you prescribe for Cyclophosphamide INDUCTION (based on the above unit of measure)?

\_\_\_\_\_

Note: If you use an increasing-dose protocol, answer with the STARTING dose.

[Answer in # form, e.g. "600"]

What is the FINAL dose for Cyclophosphamide Induction in the increasing-dose protocol?

\_\_\_\_\_

[Answer in # form, e.g. "600"]

Do you routinely refer ADOLESCENT patients to fertility specialists (sperm banking or oocyte cryopreservation) when on Cyclophosphamide treatment?

- Yes  
 No  
 Only if nearing the maximum recommended cumulative dosing limit of 10-15 g/m<sup>2</sup>.

What is the typical DURATION for INDUCTION Rituximab?

[Note: There will be separate questions for Maintenance Rituximab duration]

- 2 weeks  
 4 weeks  
 2 to 3 months  
 > 3 to 6 months  
 > 6 to 12 months

What is the INTERVAL you use for INDUCTION Rituximab?

- once weekly
- once every 2 weeks
- once every 4 weeks
- once every 6 months
- Other

Explain your answer 'Other' for Rituximab Induction Interval

---

What is the unit of measure you use to dose INDUCTION Rituximab?

- mg/m<sup>2</sup> up to a set maximum daily amount
- mg/kg up to a set maximum daily amount

What is the Dose you use for INDUCTION Rituximab (based on the above unit of measure)?

---

[Answer in # form, e.g. "375"]

What is the set maximum daily amount you use to dose INDUCTION Rituximab?

- 500 mg
- 1,000 mg
- 2,000 mg
- No set amount

What form, and how do you dose STEROIDS for INDUCTION?

- IV Methylprednisolone always
- IV Methylprednisolone usually, but depends on severity of illness at presentation
- PO Prednisone/prednisolone always
- PO Prednisone/prednisolone usually, but depends on severity of illness at presentation

How many days of IV methylprednisolone do you usually prescribe for induction?

- 1-2 days
- 3 days
- 5 days
- Other (type-in)

Expand on your answer 'Other':

---

What is the unit of measure you use to dose IV Methylprednisolone for INDUCTION?

- mg/kg up to a set maximum daily amount
- mg/m<sup>2</sup> up to a set maximum daily amount

What is the dose of IV Methylprednisolone that you prescribe (based on the unit of measure above)?

---

[Answer in # form, e.g. "2"]

What is the set maximum daily amount you use for IV Methylprednisolone for INDUCTION?

- up to 500 mg
- up to 1,000 mg
- up to 2,000 mg
- no set amount

What is the DURATION for PO prednisone/prednisolone when used for INDUCTION

- 3 days or less
- 4-5 days
- 6-7 days
- 8-30 days
- 1-3 months

[Note: There will be separate questions for Maintenance PO prednisone]

What is the INTERVAL you use for PO prednisone/prednisolone when used for INDUCTION

- Daily
- Every other day

What is the unit of measure you use for PO prednisone/prednisolone when used for INDUCTION?

- mg/kg up to a set max daily amount
- mg/m<sup>2</sup> up to a set max daily amount

What is the DOSE you use for PO prednisone/prednisolone when used for INDUCTION (based on the unit specified above)

\_\_\_\_\_

[Note: Answer in # form, e.g. "2"]

What is the maximum daily dose you use for PO prednisone/prednisolone when used for INDUCTION (based on the unit specified above)

- 60 mg
- 80 mg
- 100 mg
- No set daily dose

[Note: Answer in # form, e.g. "2"]

---



---

### SECTION 3 of 5: MAINTENANCE MEDICATIONS

The following questions address your first-line choice in maintenance medication, and pertain to your **INDIVIDUAL** preference and practice.

Do you use PO prednisone/prednisolone for maintenance?

- Always  
 Depends on severity of illness at presentation  
 Other (type-in)

[Note: Taper schedule addressed in later questions]

Expand on your answer 'Other':

\_\_\_\_\_

As the patient's clinical status allows, in what time frame do you AIM to taper OFF prednisone?

- As quickly as possible once in remission, no set duration  
 By 3 months  
 By 6 months  
 By 1 year  
 Remains on prednisone for the duration of maintenance therapy  
 Other (type-in)

Expand on your answer 'Other':

\_\_\_\_\_

Do you use Rituximab for first-line MAINTENANCE?

- Yes  
 No

What is the DURATION for MAINTENANCE rituximab?

- 0 to 6 months  
 > 6 months to 12 months  
 > 12 months to 18 months  
 > 18 months to 24 months  
 > 24 months

What is the INTERVAL you use to dose MAINTENANCE Rituximab?

- once per month  
 once every 6 months  
 once per year  
 depends on CD19 level, I dose it if CD19 rises above a set level  
 other

What is the set level for CD19 count, on which you base the decision to re-dose Rituximab?

\_\_\_\_\_

Explain your answer choice 'Other' for Rituximab dosing interval

\_\_\_\_\_

What is the unit of measure you use to dose MAINTENANCE Rituximab?

- mg/m<sup>2</sup>  
 mg/kg

What is the dose you prescribe for MAINTENANCE Rituximab (based on the unit of measure above)?

\_\_\_\_\_

[Note: Answer in # form, e.g. "375"]



What is the maximum set dose you use for MAINTENANCE Rituximab?

- 500 mg  
 1,000 mg  
 2,000 mg  
 no set maximum dose

Do you use Rituximab for first-line INDUCTION also?

- Yes  
 No

What do you use for first-line induction if your first-line maintenance preference is Rituximab?

- IV cyclophosphamide  
 PO cyclophosphamide  
 IV methylprednisolone  
 PO prednisone/prednisolone  
 IV rituximab  
 Other

You may select more than 1 response if you use multiple induction agents at once

Explain your answer 'Other'

Do you use AZATHIOPRINE or MYCOPHENOLATE MOFETIL for first-line maintenance?

- azathioprine  
 mycophenolate mofetil  
 other (type-in) - select this if you do not use rituximab, azathioprine, or mycophenolate mofetil primarily for maintenance

Expand on your answer 'Other':

Do you use Trimethoprim-Sulfamethoxazole (Bactrim) as part of the maintenance therapy?

- No  
 Yes, but purely for infection / PJP prophylaxis  
 Yes, to decrease the risk of relapse by decreasing sino-pulmonary carriage of staph/strep bacteria  
 Yes, used for BOTH PJP prophylaxis AND to reduce relapses

Do you monitor Staph or Strep carriage in nasal passages through swab/culture?

- No  
 Yes once at the start of treatment  
 Yes, I test periodically

Do you use the swab/culture result to determine whether to treat with Bactrim as part of the maintenance regimen?

- No, I will use Bactrim for maintenance regardless of result.  
 Yes, I will only use Bactrim for maintenance if there is positive staph/strep carriage

At what interval do you prescribe Bactrim (trimethoprim/sulfamethoxazole)?

- once per day on weekends only  
 once daily (7 days a week)  
 three times per week

How long do you AIM to keep patients on maintenance medication, assuming they remain in remission during that time period without complications, before you try weaning off maintenance?

- 1 to 6 months  
 > 6 to 12 months  
 > 12 to 18 months  
 > 18 months to 2 years  
 > 2 years to 3 years  
 indefinitely, I keep them on maintenance unless they develop a complication  
 Other (type-in)

Expand on your answer 'Other':

---



---

## SECTION 4 of 5: Assessing GPA disease activity and defining relapse

Do you always obtain a renal biopsy to confirm a diagnosis of GPA?

- Yes  
 No

Do you always obtain CT-scan to assess for extent of sino-pulmonary disease once a diagnosis of GPA is made?

- Yes I always obtain a FULL CT Head, Neck, Sinus, and Chest/Lungs  
 Yes but I obtain a LIMITED CT-scan depending on clinical presentation [This answer choice prompts a follow-up question]  
 No, never

If you obtain a LIMITED set of CT-scans at time of diagnosis, what do you obtain?

- CT Head always  
 CT Neck always  
 CT Sinus always  
 CT Chest/Lungs always  
 Any combination of the above, but ONLY if the patient has active symptoms.

[Note: you may select multiple answers]

How do you define a GPA relapse: i.e. do you think there are pure serologic, pure clinical relapses, or must a relapse be a mixture of both?

- Clinical characteristics and symptomatology  
 Serological marker elevation  
 EITHER clinical OR serological marker elevation  
 BOTH clinical AND serological marker elevation are required simultaneously to declare relapse

Which of the following do you routinely assess to diagnose a GPA relapse?

- Clinical symptomatology (informal assessment), e.g. presence of fatigue, new rash, sinopulmonary symptoms.  
 Elevation in Birmingham Vasculitis Activity Score (BVAS)  
 Elevation of serum ESR or CRP  
 Elevation of ANCA titer  
 Hematuria and/or proteinuria  
 Other

[Note: you may select more than 1 answer]

Explain how you use the BVAS score to define relapse

---

Expand on your answer 'Other':

---

At what time interval do you typically monitor ANCA titers?

- Never  
 Every 3 months  
 Every 6 months  
 Once per year  
 Only at times I am concerned about a clinical relapse  
 Other (type-in)

Expand on your answer 'Other':

---

---



---

**SECTION 5 of 5: Management of End-Stage Renal Disease in GPA**

When considering dialysis modality for a pediatric patient with GPA:

Aside from routine considerations of modality, do you PREFER Hemodialysis over Peritoneal Dialysis (PD) because of the risk of infection from immunosuppression on PD?

- Yes  
 No Preference  
 Unsure - I don't manage dialysis

Once a patient is on dialysis, do you try to taper off the immunosuppression earlier than a non-dialysis GPA patient?

- Yes  
 No  
 Unsure - I don't manage dialysis

If you have a pediatric patient with GPA and end stage renal disease, how much time in remission do you feel is 'safe' to list for Status 1/Active Kidney Transplant?

- If in remission < 1 month, list for status 1 transplant immediately  
 1-3 months  
 4-6 months  
 7-9 months  
 10-12 months  
 13-18 months  
 19-24 months  
 Other (type-in)  
 Unsure - I don't manage transplant

Expand on your answer 'Other':

Do you wait for ANCA titer to become negative before listing for transplant?

- Yes  
 No  
 Unsure - I don't manage transplant

Do you believe ANCA titer positivity AT THE TIME OF RENAL TRANSPLANT influences graft survival or vasculitis relapse rate?

- Yes  
 No  
 Unsure - I don't manage transplant

Is your Renal Transplant INDUCTION immunosuppression for a patient with GPA any different than a non-GPA renal transplant patient?

- Yes  
 No  
 Unsure - I don't manage transplant

What is your Renal Transplant INDUCTION immunosuppression regimen of choice for someone with GPA?

[Note: you may select more than 1 answer if you use multiple of these agents for induction at once]

- anti-thymocyte globulin or other Polyclonal agents  
 basiliximab or other Monoclonal agents  
 IV steroid  
 mycophenolate mofetil  
 Other  
 Unsure - I don't manage transplant

Expand on your answer 'Other':

Is your Renal Transplant MAINTENANCE immunosuppression for a patient with GPA any different than a non-GPA renal transplant patient?

- Yes  
 No  
 Unsure - I don't manage transplant

What is your Renal Transplant MAINTENANCE immunosuppression regimen of choice for someone with GPA?

- mycophenolate mofetil
- tacrolimus or sirolimus
- prednisone
- cyclosporine A
- azathioprine
- Other
- Unsure - I don't manage transplant

Expand on your answer 'Other':

---
